# Supplementary material for: Evaluation of the Fungicidal Effect of Some Commercial Disinfectant and Sterilizer Agents Formulated as Soluble Liquid against Sclerotium rolfsii Infected Tomato Plant
Source: MDPI journal article supplement (doi:10.3390/plants11243542), 2022-12-15
Supplement: s1 [file s1]

**Supplementary Table S1.** Effect of antiseptic and disinfectant agents at different concentrations on growth parameters of tomato seedlings infected by *Sclerotium rolfsii* at 35 DAP.

| Treatments                |                            | Root length<br>(cm plant <sup>-1</sup> ) |    | Shoot length<br>(cm plant <sup>-1</sup> ) |     | Total length<br>(cm plant <sup>-1</sup> ) |     | Fresh weight<br>(g)     |    | Dry weight<br>(g)        |     |
|---------------------------|----------------------------|------------------------------------------|----|-------------------------------------------|-----|-------------------------------------------|-----|-------------------------|----|--------------------------|-----|
| Disinfectants             | Concentrations             | Means ± SE                               | %  | Means ± SE                                | %   | Means ± SE                                | %   | Means ± SE              | %  | Means ± SE               | %   |
| Control infected soil     | NA                         | 2.1±0.06 <sup>h</sup>                    | 0  | 14.6±0.50 <sup>i</sup>                    | 0   | 16.7±0.56 <sup>i</sup>                    | 0   | 1.84±0.07 <sup>f</sup>  | 0  | 0.11±0.004 <sup>g</sup>  | 0   |
| Control sterilized soil   | NA                         | 3.8±0.08 <sup>ab</sup>                   | 81 | 33.0±0.55 <sup>a</sup>                    | 126 | 36.8±0.58 <sup>a</sup>                    | 120 | 3.52±0.08 <sup>a</sup>  | 92 | 0.24±0.003 <sup>a</sup>  | 122 |
|                           | 125µl 100ml <sup>-1</sup>  | 2.4±0.08 <sup>g</sup>                    | 14 | 22.3±0.61 <sup>f</sup>                    | 53  | 24.7±0.68 <sup>f</sup>                    | 48  | 2.37±0.05 <sup>d</sup>  | 29 | 0.16±0.004 <sup>cd</sup> | 47  |
| Phenol formulated<br>(7%) | 250µl 100ml <sup>-1</sup>  | 2.7±0.09 <sup>ef</sup>                   | 29 | 24.6±0.60 <sup>e</sup>                    | 68  | 27.3±0.69 <sup>de</sup>                   | 63  | 2.63±0.06 <sup>c</sup>  | 43 | 0.17±0.003 <sup>c</sup>  | 58  |
|                           | 500µl 100ml <sup>-1</sup>  | 3.4±0.06 <sup>c</sup>                    | 62 | 27.0±0.53 <sup>d</sup>                    | 85  | 30.4±0.59 <sup>c</sup>                    | 82  | 2.94±0.08 <sup>b</sup>  | 60 | 0.19±0.004 <sup>b</sup>  | 79  |
|                           | 1000µl 100ml <sup>-1</sup> | 4.0±0.09 <sup>a</sup>                    | 90 | 29.6±0.46 <sup>b</sup>                    | 103 | 33.6±0.54 <sup>b</sup>                    | 101 | 3.38±0.05 <sup>a</sup>  | 84 | 0.20±0.005 <sup>b</sup>  | 89  |
|                           | 125µl 100ml <sup>-1</sup>  | 2.8±0.06 <sup>e</sup>                    | 33 | 26.2±0.56 <sup>de</sup>                   | 79  | 29.0±0.61 <sup>cd</sup>                   | 74  | 2.54±0.06 <sup>cd</sup> | 38 | 0.16±0.004 <sup>c</sup>  | 55  |
| Chloroxylenol (10%)       | 250µl 100ml <sup>-1</sup>  | 3.6±0.06 <sup>bc</sup>                   | 71 | 28.7±0.65 <sup>bc</sup>                   | 97  | 32.3±0.71 <sup>b</sup>                    | 93  | 2.90±0.05 <sup>b</sup>  | 58 | 0.19±0.004 <sup>b</sup>  | 82  |
|                           | 500µl 100ml <sup>-1</sup>  | 2.5±0.09 <sup>fg</sup>                   | 19 | 24.6±0.55 <sup>e</sup>                    | 68  | 27.1±0.63 <sup>e</sup>                    | 62  | 2.37±0.06 <sup>d</sup>  | 29 | 0.15±0.005 <sup>de</sup> | 42  |
|                           | 125µl 100ml <sup>-1</sup>  | 2.5±0.08 <sup>fg</sup>                   | 19 | 22.7±0.59 <sup>f</sup>                    | 55  | 25.2±0.66 <sup>f</sup>                    | 51  | 2.37±0.05 <sup>d</sup>  | 29 | 0.14±0.005 <sup>e</sup>  | 34  |
| Phenic<br>(10%)           | 250µl 100ml <sup>-1</sup>  | 2.4±0.07 <sup>g</sup>                    | 14 | 20.0±0.50 <sup>g</sup>                    | 37  | 22.4±0.57 <sup>g</sup>                    | 34  | 2.17±0.05 <sup>e</sup>  | 18 | 0.12±0.003 <sup>f</sup>  | 15  |
|                           | 500µl 100ml <sup>-1</sup>  | 2.3±0.08 <sup>gh</sup>                   | 10 | 17.3±0.54 <sup>h</sup>                    | 18  | 19.6±0.61 <sup>h</sup>                    | 17  | 1.97±0.07 <sup>f</sup>  | 7  | 0.11±0.005 <sup>fg</sup> | 6   |
| Atrio (80%)               | 2 g L <sup>-1</sup>        | 3.1±0.10 <sup>d</sup>                    | 48 | 27.1±0.59 <sup>cd</sup>                   | 86  | 30.2±0.67 <sup>c</sup>                    | 81  | 3.03±0.05 <sup>b</sup>  | 65 | 0.19±0.004 <sup>b</sup>  | 81  |

The values showed in the table are means ± standard error, followed by different alphabetic letter/s are significantly different ( $P < 0.05$ ) following Tukey's post-hoc test. Percent change (%) calculated based on control infected soil.

**Supplementary Table S2.** Effect of antiseptic and disinfectant agents at different concentrations on leaf pigments of tomato seedlings infected by *Sclerotium rolfii* at 35 DAP.

| Treatments                |                            | Chlorophyll a<br>(mg g <sup>-1</sup> FW) |    | Chlorophyll b<br>(mg g <sup>-1</sup> FW) |    | Total Chlorophyll<br>(mg g <sup>-1</sup> FW) |    | Total Carotenoids<br>(mg g <sup>-1</sup> FW) |    |
|---------------------------|----------------------------|------------------------------------------|----|------------------------------------------|----|----------------------------------------------|----|----------------------------------------------|----|
| Disinfectants             | Concentrations             | Means ± SE                               | %  | Means ± SE                               | %  | Means ± SE                                   | %  | Means ± SE                                   | %  |
| Control infected soil     | NA                         | 0.31±0.007 <sup>g</sup>                  | 0  | 0.18±0.003 <sup>e</sup>                  | 0  | 0.49±0.010 <sup>h</sup>                      | 0  | 0.097±0.002 <sup>e</sup>                     | 0  |
| Control sterilized soil   | NA                         | 0.42±0.005 <sup>a</sup>                  | 36 | 0.26±0.004 <sup>a</sup>                  | 46 | 0.68±0.008 <sup>a</sup>                      | 39 | 0.123±0.004 <sup>a</sup>                     | 27 |
|                           | 125µl 100ml <sup>-1</sup>  | 0.34±0.008 <sup>ef</sup>                 | 9  | 0.19±0.005 <sup>d</sup>                  | 9  | 0.53±0.012 <sup>fg</sup>                     | 9  | 0.103±0.004 <sup>cde</sup>                   | 6  |
| Phenol formulated<br>(7%) | 250µl 100ml <sup>-1</sup>  | 0.36±0.006 <sup>de</sup>                 | 14 | 0.20±0.003 <sup>d</sup>                  | 14 | 0.56±0.009 <sup>ef</sup>                     | 14 | 0.107±0.004 <sup>cd</sup>                    | 10 |
|                           | 500µl 100ml <sup>-1</sup>  | 0.39±0.007 <sup>c</sup>                  | 26 | 0.23±0.005 <sup>bc</sup>                 | 29 | 0.62±0.010 <sup>cd</sup>                     | 27 | 0.118±0.004 <sup>ab</sup>                    | 22 |
|                           | 1000µl 100ml <sup>-1</sup> | 0.42±0.005 <sup>ab</sup>                 | 34 | 0.24±0.004 <sup>b</sup>                  | 36 | 0.66±0.009 <sup>ab</sup>                     | 34 | 0.119±0.003 <sup>ab</sup>                    | 23 |
|                           | 125µl 100ml <sup>-1</sup>  | 0.37±0.006 <sup>d</sup>                  | 19 | 0.23±0.004 <sup>bc</sup>                 | 28 | 0.60±0.009 <sup>d</sup>                      | 22 | 0.117±0.003 <sup>ab</sup>                    | 21 |
| Chloroxylenol (10%)       | 250µl 100ml <sup>-1</sup>  | 0.39±0.007 <sup>c</sup>                  | 25 | 0.23±0.005 <sup>bc</sup>                 | 31 | 0.62±0.011 <sup>cd</sup>                     | 27 | 0.111±0.003 <sup>bc</sup>                    | 14 |
|                           | 500µl 100ml <sup>-1</sup>  | 0.36±0.006 <sup>d</sup>                  | 16 | 0.20±0.005 <sup>d</sup>                  | 14 | 0.56±0.010 <sup>ef</sup>                     | 15 | 0.110±0.003 <sup>bc</sup>                    | 13 |
|                           | 125µl 100ml <sup>-1</sup>  | 0.37±0.007 <sup>d</sup>                  | 19 | 0.20±0.006 <sup>d</sup>                  | 11 | 0.57±0.013 <sup>e</sup>                      | 16 | 0.110±0.004 <sup>bc</sup>                    | 13 |
| Phenic<br>(10%)           | 250µl 100ml <sup>-1</sup>  | 0.34±0.008 <sup>ef</sup>                 | 9  | 0.22±0.006 <sup>c</sup>                  | 25 | 0.56±0.013 <sup>ef</sup>                     | 15 | 0.111±0.003 <sup>bc</sup>                    | 14 |
|                           | 500µl 100ml <sup>-1</sup>  | 0.33±0.008 <sup>f</sup>                  | 7  | 0.19±0.006 <sup>d</sup>                  | 8  | 0.52±0.013 <sup>g</sup>                      | 7  | 0.100±0.002 <sup>de</sup>                    | 3  |
| Atrio (80%)               | 2 g L <sup>-1</sup>        | 0.40±0.006 <sup>bc</sup>                 | 29 | 0.24±0.003 <sup>b</sup>                  | 34 | 0.64±0.009 <sup>bc</sup>                     | 31 | 0.119±0.003 <sup>ab</sup>                    | 23 |

The values showed in the table are means ± standard error, followed by different alphabetic letter/s are significantly different ( $P < 0.05$ ) following Tukey's post-hoc test. Percent change (%) calculated based on control infected soil.

**Supplementary Table S3.** Effect of antiseptic and disinfectant agents at different concentrations on chemical constituents of tomato seedlings infected by *Sclerotium rolfsii* at 35 DAP.

| Treatments                |                            | Total Protein<br>(mg g <sup>-1</sup> DW) |    | Total<br>Carbohydrates<br>(mg g <sup>-1</sup> DW) |    | Proline<br>(μmole g <sup>-1</sup> DW) |     | Total Phenols<br>(mg g <sup>-1</sup> DW) |     |
|---------------------------|----------------------------|------------------------------------------|----|---------------------------------------------------|----|---------------------------------------|-----|------------------------------------------|-----|
| Disinfectants             | Concentrations             | Means ± SE                               | %  | Means ± SE                                        | %  | Means ± SE                            | %   | Means ± SE                               | %   |
| Control infected soil     | NA                         | 12.5±0.36 <sup>h</sup>                   | 0  | 8.5±0.31 <sup>h</sup>                             | 0  | 1.20±0.029 <sup>a</sup>               | 0   | 8.5±0.21 <sup>a</sup>                    | 0   |
| Control sterilized soil   | NA                         | 23.3±0.38 <sup>a</sup>                   | 86 | 14.2±0.33 <sup>a</sup>                            | 67 | 0.55±0.026 <sup>e</sup>               | -54 | 2.8±0.18 <sup>f</sup>                    | -67 |
|                           | 125μl 100ml <sup>-1</sup>  | 16.3±0.31 <sup>f</sup>                   | 30 | 10.2±0.36 <sup>g</sup>                            | 20 | 0.71±0.032 <sup>bc</sup>              | -41 | 6.1±0.17 <sup>b</sup>                    | -28 |
| Phenol formulated<br>(7%) | 250μl 100ml <sup>-1</sup>  | 18.2±0.33 <sup>d</sup>                   | 46 | 11.7±0.32 <sup>de</sup>                           | 38 | 0.63±0.029 <sup>cde</sup>             | -48 | 5.3±0.17 <sup>c</sup>                    | -38 |
|                           | 500μl 100ml <sup>-1</sup>  | 21.7±0.35 <sup>c</sup>                   | 74 | 11.7±0.33 <sup>de</sup>                           | 38 | 0.63±0.025 <sup>cde</sup>             | -48 | 4.7±0.22 <sup>d</sup>                    | -45 |
|                           | 1000μl 100ml <sup>-1</sup> | 22.8±0.42 <sup>ab</sup>                  | 82 | 13.2±0.32 <sup>b</sup>                            | 55 | 0.60±0.031 <sup>e</sup>               | -50 | 3.1±0.18 <sup>f</sup>                    | -64 |
|                           | 125μl 100ml <sup>-1</sup>  | 15.1±0.32 <sup>g</sup>                   | 21 | 11.2±0.33 <sup>ef</sup>                           | 32 | 0.73±0.025 <sup>b</sup>               | -39 | 6.3±0.15 <sup>b</sup>                    | -26 |
| Chloroxylenol (10%)       | 250μl 100ml <sup>-1</sup>  | 18.2±0.42 <sup>d</sup>                   | 46 | 12.5±0.36 <sup>bcd</sup>                          | 47 | 0.71±0.035 <sup>bc</sup>              | -41 | 5.1±0.18 <sup>cd</sup>                   | -40 |
|                           | 500μl 100ml <sup>-1</sup>  | 17.6±0.32 <sup>de</sup>                  | 41 | 10.5±0.40 <sup>fg</sup>                           | 24 | 0.73±0.031 <sup>b</sup>               | -39 | 5.3±0.17 <sup>c</sup>                    | -38 |
|                           | 125μl 100ml <sup>-1</sup>  | 18.0±0.35 <sup>de</sup>                  | 44 | 11.8±0.33 <sup>cde</sup>                          | 39 | 0.77±0.035 <sup>b</sup>               | -36 | 5.4±0.16 <sup>c</sup>                    | -37 |
| Phenic<br>(10%)           | 250μl 100ml <sup>-1</sup>  | 17.2±0.31 <sup>def</sup>                 | 38 | 11.8±0.31 <sup>cde</sup>                          | 39 | 0.71±0.032 <sup>bc</sup>              | -41 | 6.2±0.18 <sup>b</sup>                    | -28 |
|                           | 500μl 100ml <sup>-1</sup>  | 17.1±0.32 <sup>ef</sup>                  | 37 | 12.0±0.32 <sup>cde</sup>                          | 41 | 0.70±0.029 <sup>bcd</sup>             | -42 | 6.2±0.19 <sup>b</sup>                    | -27 |
| Atrio (80%)               | 2 g L <sup>-1</sup>        | 21.8±0.31 <sup>bc</sup>                  | 74 | 12.7±0.35 <sup>bc</sup>                           | 49 | 0.62±0.026 <sup>de</sup>              | -48 | 3.7±0.16 <sup>e</sup>                    | -57 |

The values showed in the table are means ± standard error, followed by different alphabetic letter/s are significantly different ( $P < 0.05$ ) following Tukey's post-hoc test. Percent change (%) calculated based on control infected soil.
